# Supplementary material for: βT87Q-Globin Gene Therapy Reduces Sickle Hemoglobin Production, Allowing for Ex Vivo Anti-sickling Activity in Human Erythroid Cells
Source: PubMed Central journal article supplement — Mol Ther Methods Clin Dev. 2020 Apr 18;17:912–21. doi: 10.1016/j.omtm.2020.04.013 (PMC7210457; doi:10.1016/j.omtm.2020.04.013), 2020-04-18
Supplement: mmc1.pdf [file mmc1.pdf]

OMTM, Volume 17

## Supplemental Information

### **$\beta$ T87Q-Globin Gene Therapy Reduces Sickle Hemoglobin Production, Allowing for *Ex Vivo* Anti-sickling Activity in Human Erythroid Cells**

**Selami Demirci, Bjorg Gudmundsdottir, Quan Li, Juan J. Haro-Mora, Tina Nassehi, Claire Drysdale, Morgan Yapundich, Jackson Gamer, Fayaz Seifuddin, John F. Tisdale, and Naoya Uchida**

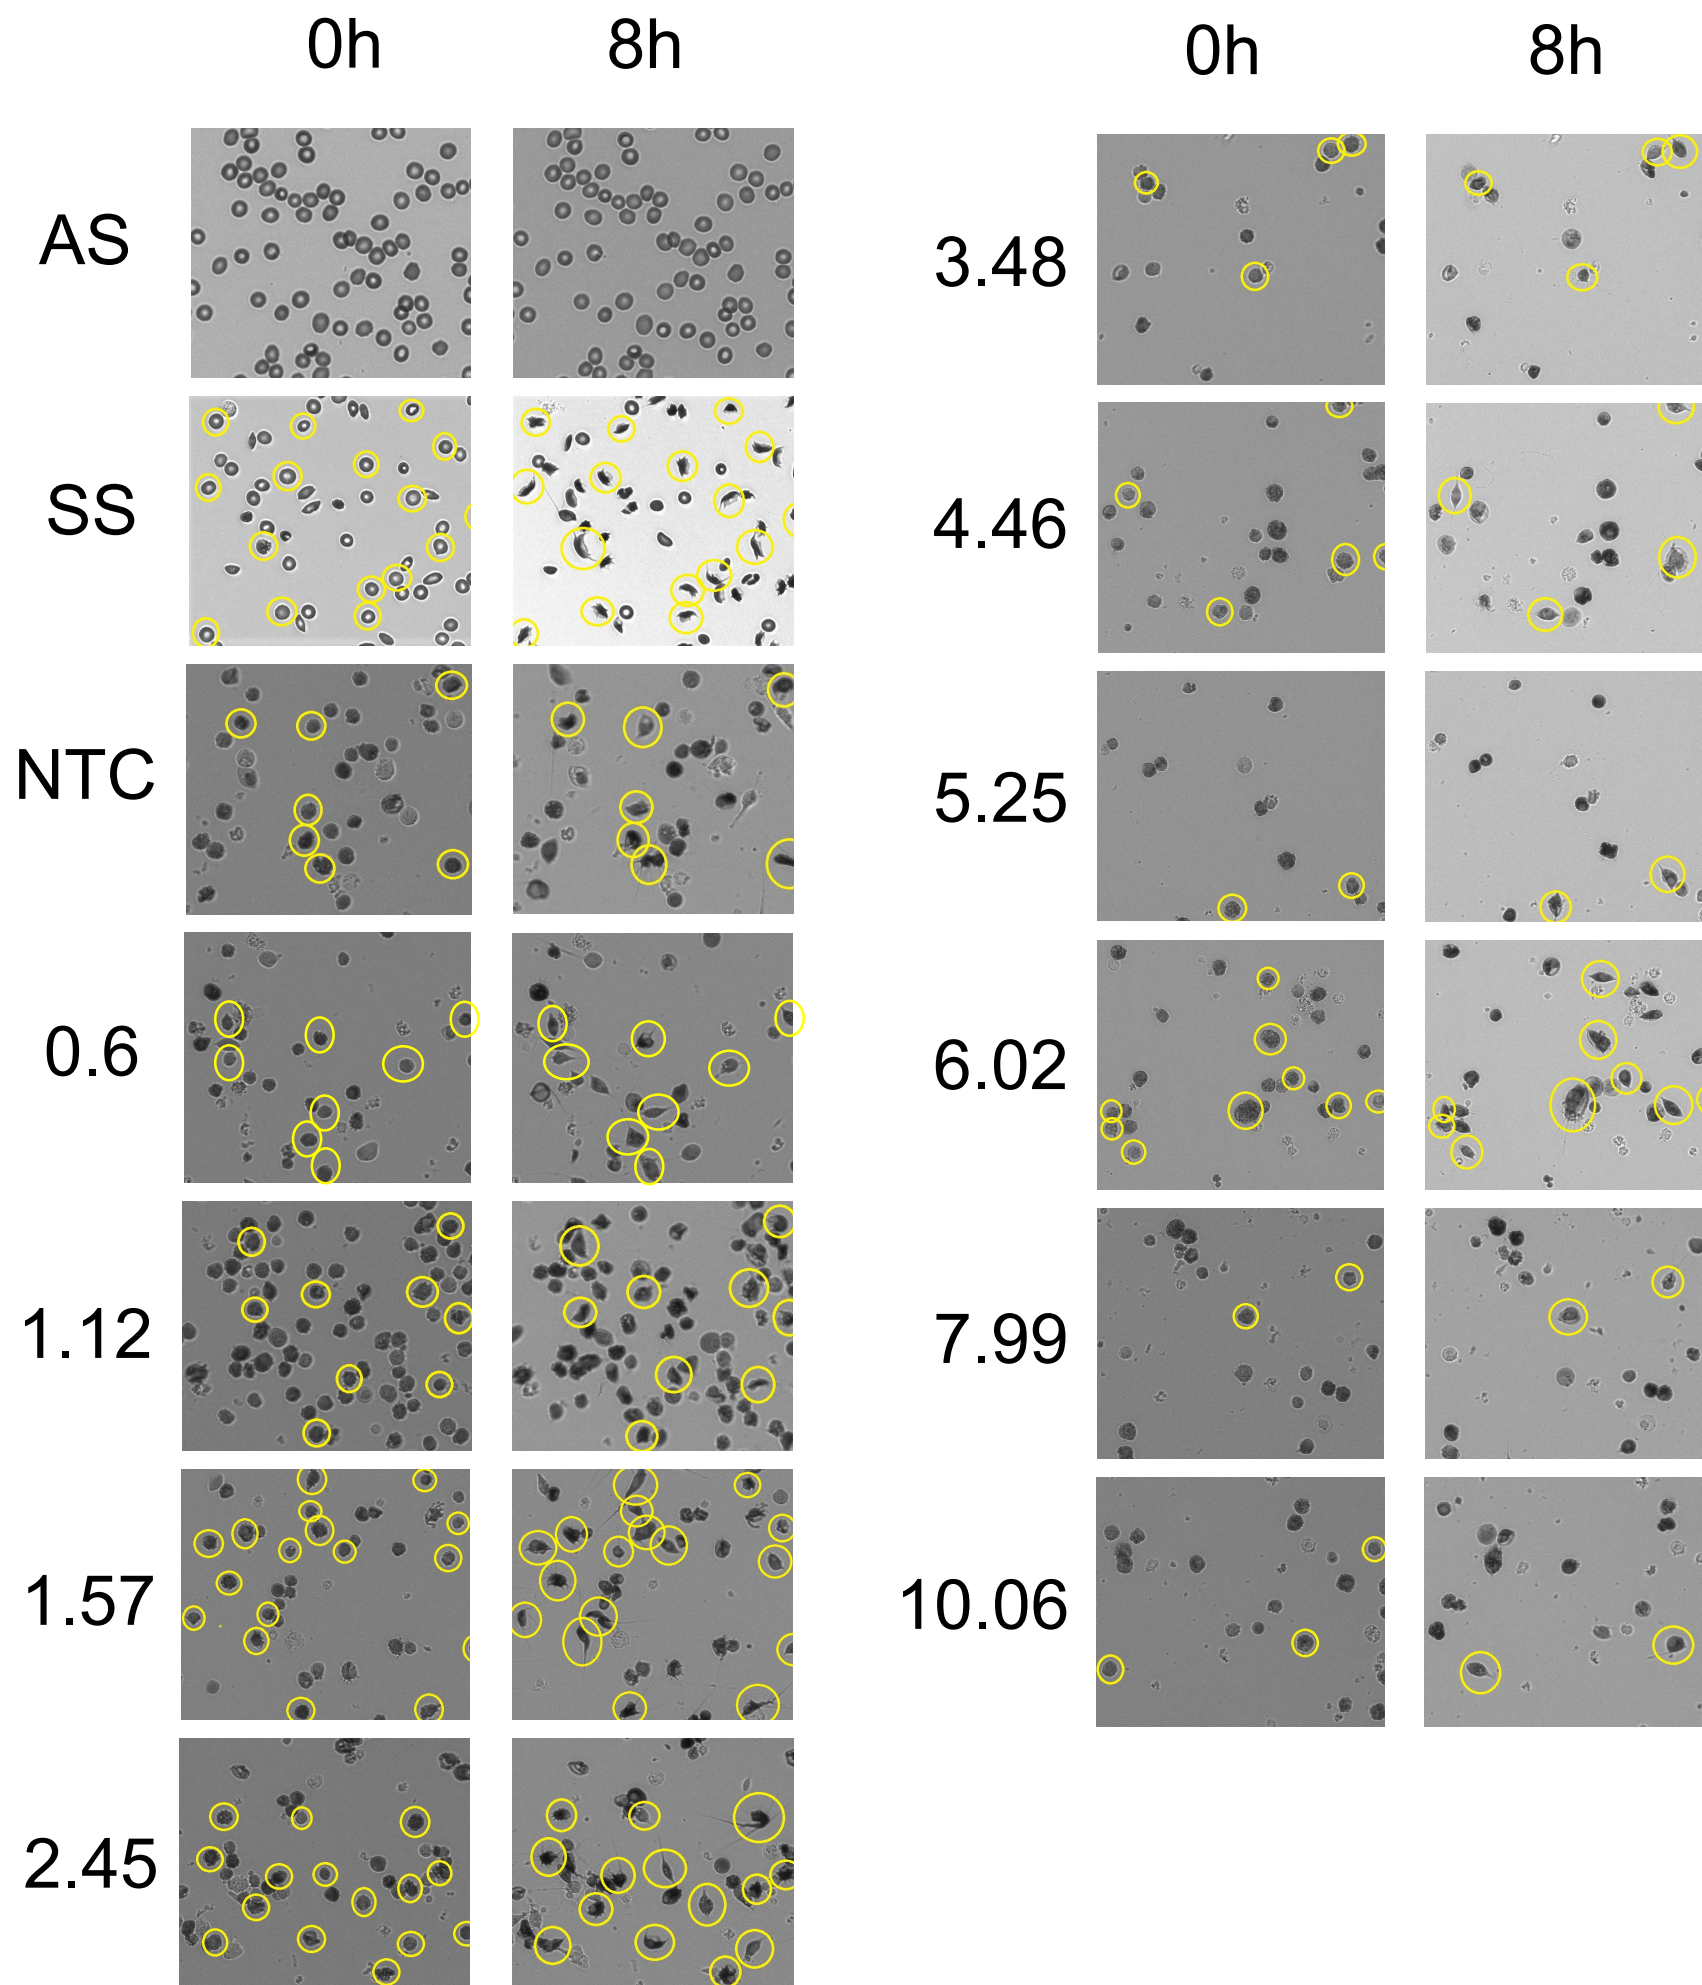

**Figure S1.** Sickling of HbA/HbS (AS) or HbS/HbS (SS) human red blood cells, and sHUDEP-2 cells with/without  $\beta$ T87Q-globin expression under deoxygenated conditions.

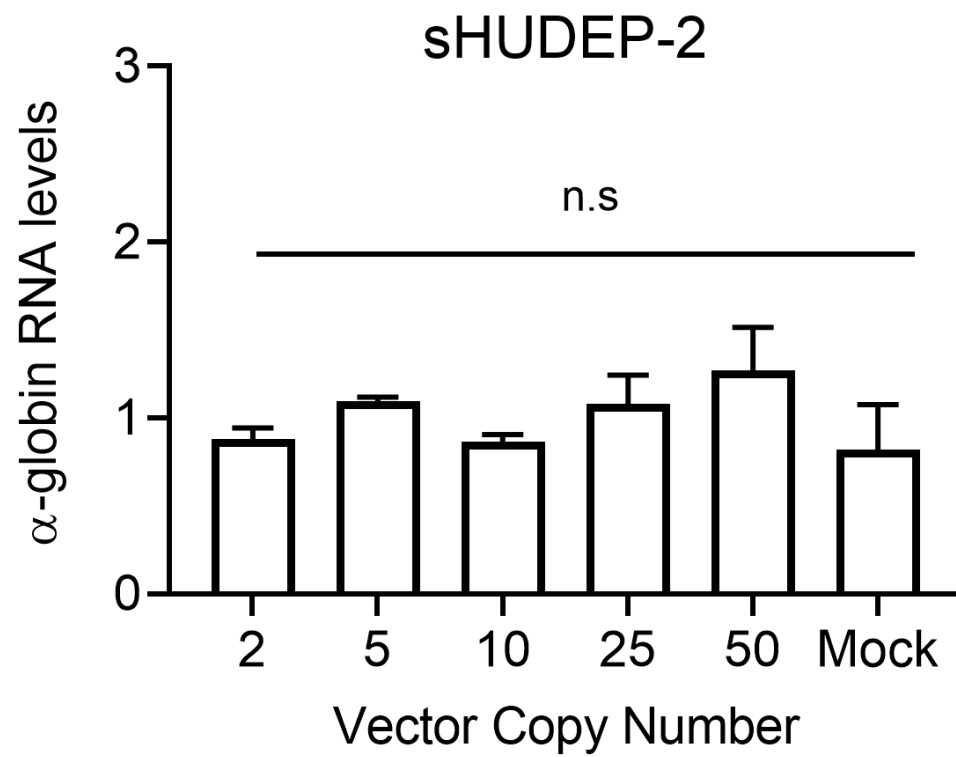

**Figure S2.** α-globin RNA transcripts in βT87Q-globin vector transduced sHUDEP-2 cells. The data were normalized using rRNA RNA levels (n=3),  $P < 0.05$ .

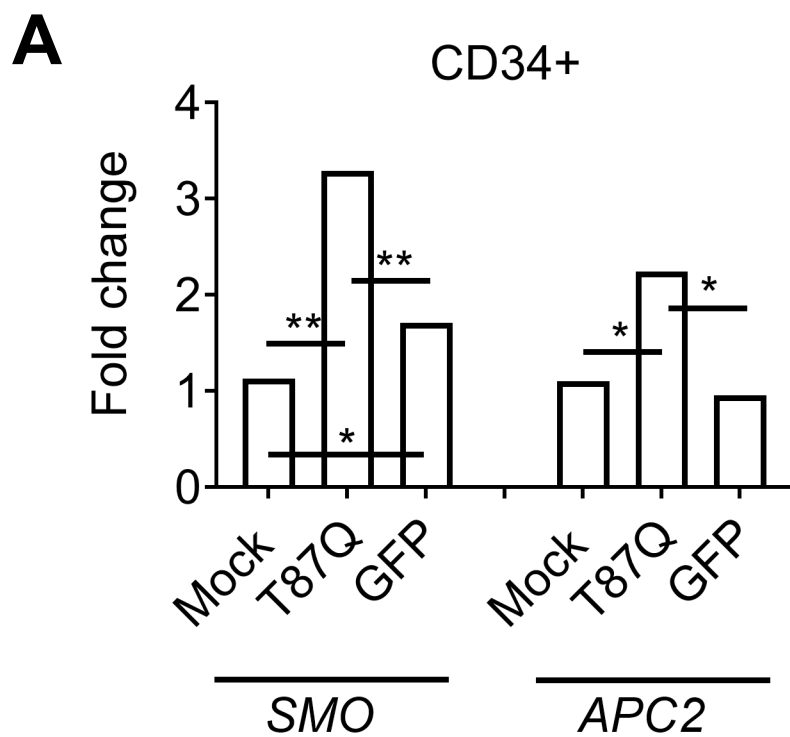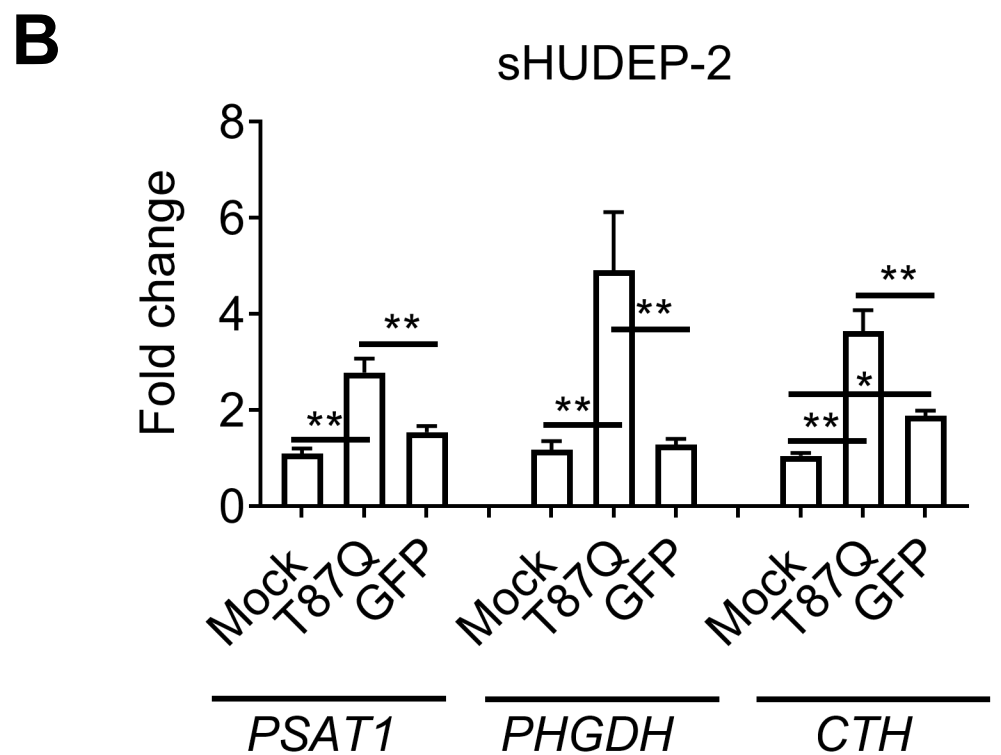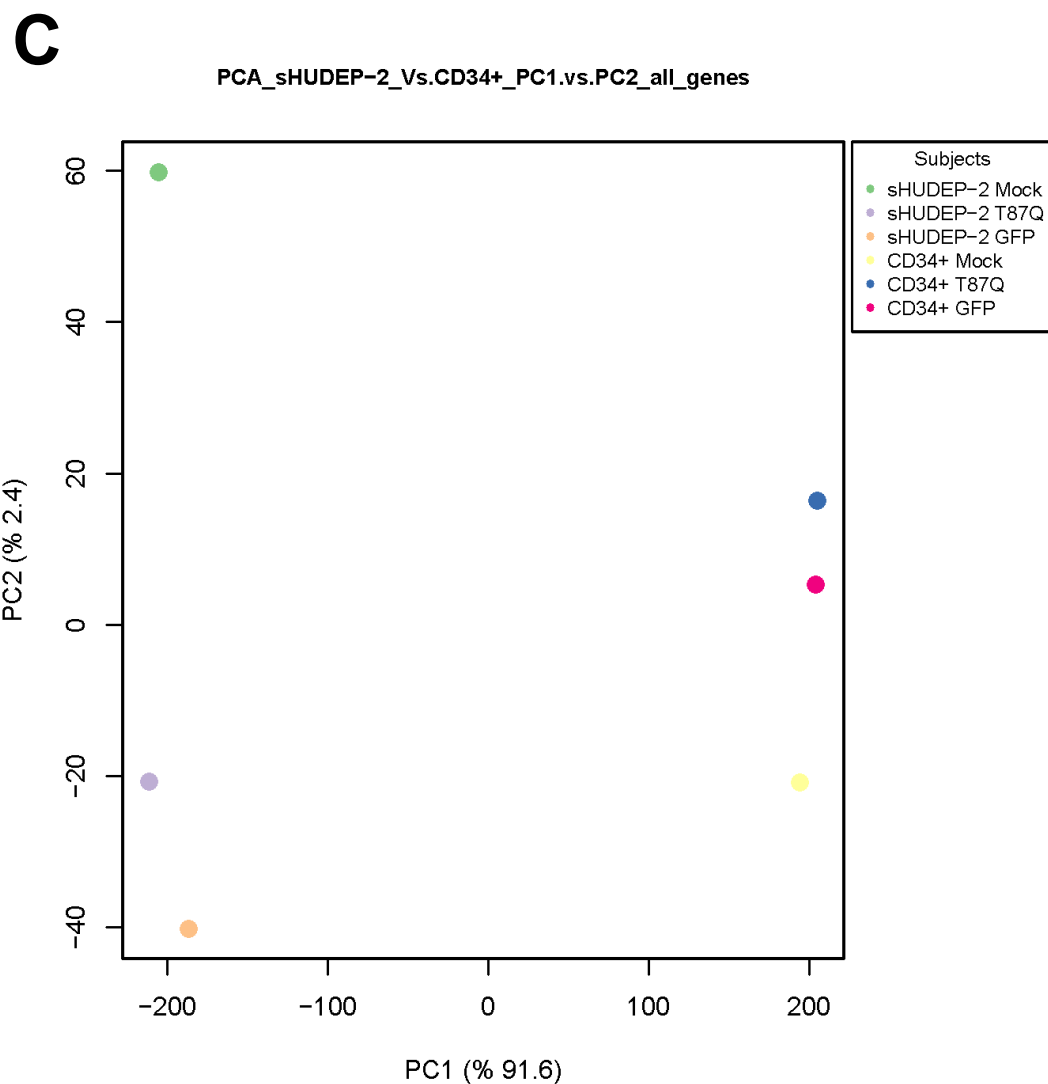

**Figure S3.** Confirmation of RNA-Seq data by qPCR in (A) CD34+, and (B) sHUDEP-2 cells. Reference genes were selected from genes differentially expressed in either  $\beta$ T87Q-CD34+ or  $\beta$ T87Q-sHUDEP-2 cells (n=3), \* $P$ <0.05, and \*\* $P$ <0.05. (C) Principal Component Analysis (PCA) for RNA-Seq data.
